# Supplementary material for: A Machine Learning Framework for Cancer Prognostics: Integrating Temporal and Immune Gene Dynamics via ARIMA-CNN
Source: bioRxiv or medRxiv preprint supplement (doi:10.1101/2024.12.09.24318717), 2024-12-10
Supplement: Supplementary file [file media-2.pdf]

(A)

Clustered Heatmap of Immune Cells and Markers

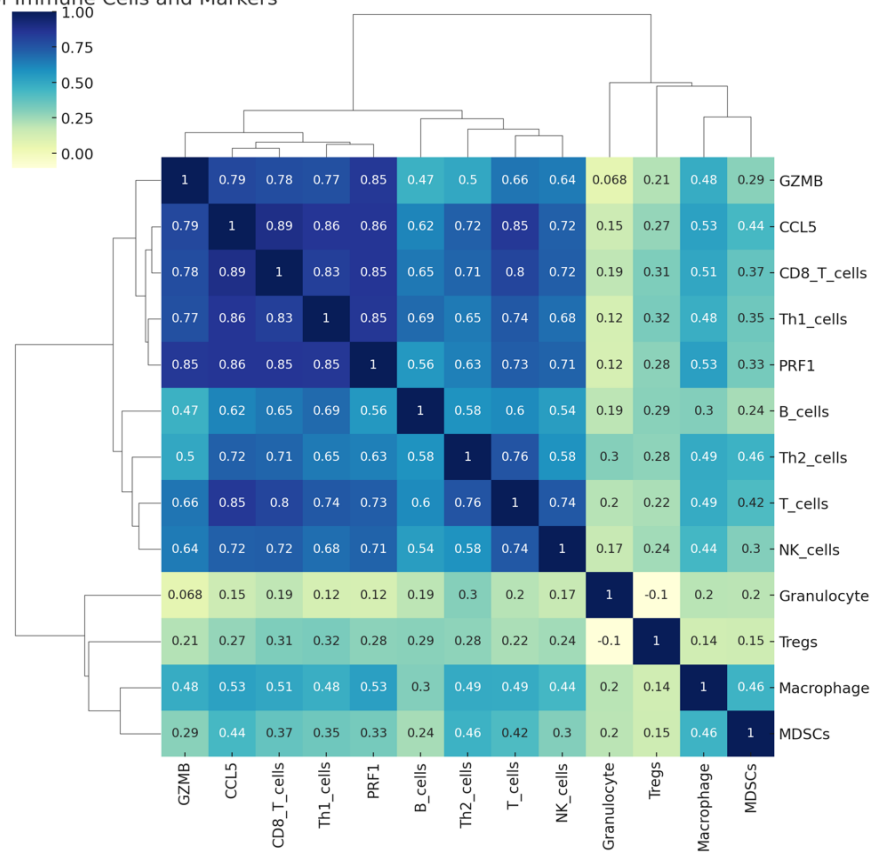

(B)

P-Value Matrix with Statistical Significance Highlighted ( $p < 0.05$ )

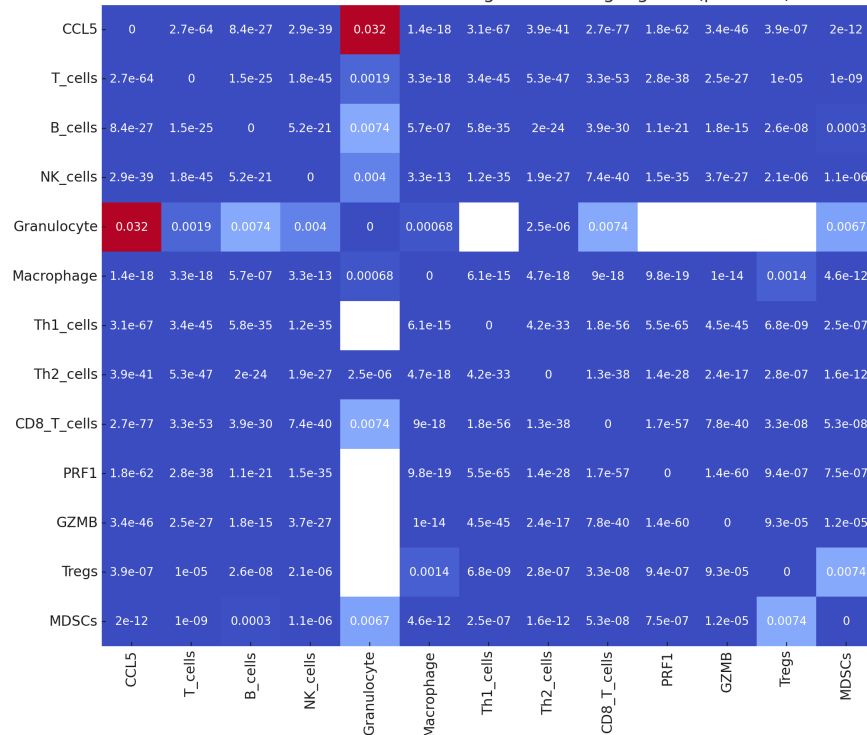

**Figure S2. The non-parametric correlation analysis between CCL5 expression and various immune cells.**

(A) Non-parametric Spearman rho between CCL5 and the selected immune genes are calculated and analyzed to determine the strength and direction of their linear relationships. (B) The correlation of the  $p$ -value matrix with incorporated in the figure.
