# Supplementary material for: A Machine Learning Framework for Cancer Prognostics: Integrating Temporal and Immune Gene Dynamics via ARIMA-CNN
Source: bioRxiv or medRxiv preprint supplement (doi:10.1101/2024.12.09.24318717), 2024-12-10
Supplement: Supplementary file [file media-4.pdf]

## Supplementary Tables

**Table S1. Diagnostic Tests**

| Test                   | Statistic | Prob. |
|------------------------|-----------|-------|
| Ljung-Box (L1) (Q)     | 0.07      | 0.78  |
| Jarque-Bera (JB)       | 1.1       | 0.58  |
| Heteroskedasticity (H) | 1.21      | 0.42  |
