# Supplementary material for: A Machine Learning Framework for Cancer Prognostics: Integrating Temporal and Immune Gene Dynamics via ARIMA-CNN
Source: bioRxiv or medRxiv preprint supplement (doi:10.1101/2024.12.09.24318717), 2024-12-10
Supplement: Supplementary file [file media-5.pdf]

**Table S2. Median Split Analysis of Single Gene.**

| <b>Immune signatures</b> | <b>HR</b> | <b>95% CI</b> | <b>Cox <i>p</i>-value</b> | <b>Log-rank <i>p</i>-value</b> |
|--------------------------|-----------|---------------|---------------------------|--------------------------------|
| CCL5                     | 0.8638    | 0.7428-1.0045 | 0.0572                    | 0.0777                         |
| T cells                  | 0.9366    | 0.8320-1.0544 | 0.2785                    | 0.1115                         |
| B cells                  | 0.8581    | 0.7673-0.9595 | 0.0073                    | 0.0087                         |
| NK cells                 | 0.9486    | 0.8175-1.1007 | 0.4869                    | 0.7471                         |
| Granulocyte              | 1.0565    | 0.9130-1.2225 | 0.4605                    | 0.5039                         |
| Macrophage               | 1.0082    | 0.8026-1.2663 | 0.9442                    | 0.2526                         |
| Th1 cells                | 0.7485    | 0.6226-0.8998 | 0.0020                    | 0.0045                         |
| Th2 cells                | 0.9907    | 0.8549-1.1481 | 0.9011                    | 0.5972                         |
| CD8 T cells              | 0.8037    | 0.7002-0.9224 | 0.0019                    | 0.0064                         |
| PRF1                     | 0.8473    | 0.7050-1.0182 | 0.0770                    | 0.2426                         |
| GZMB                     | 0.8601    | 0.7412-0.9980 | 0.0471                    | 0.2017                         |
| Tregs                    | 0.8727    | 0.7774-0.9796 | 0.0210                    | 0.0343                         |
| MDSCs                    | 1.0723    | 0.9140-1.2580 | 0.3915                    | 0.8359                         |
