# Supplementary material for: A Machine Learning Framework for Cancer Prognostics: Integrating Temporal and Immune Gene Dynamics via ARIMA-CNN
Source: bioRxiv or medRxiv preprint supplement (doi:10.1101/2024.12.09.24318717), 2024-12-10
Supplement: Supplementary file [file media-6.pdf]

**Table S3. CCL5-ARIMA-CNN Extracted Features of Single Gene.**

| <b>Immune signatures</b> | <b>HR</b> | <b>95% CI</b>  | <b>Cox <i>p</i>-value</b> | <b>Log-rank <i>p</i>-value</b> |
|--------------------------|-----------|----------------|---------------------------|--------------------------------|
| T cells                  | 0.9262    | 0.7931-1.0817  | 0.3328                    | 0.1115                         |
| B cells                  | 0.7322    | 0.5835-0.9189  | 0.0072                    | 0.0087                         |
| NK cells                 | 0.9278    | 0.7522-1.1445  | 0.4842                    | 0.7471                         |
| Granulocyte              | 2.9884    | 0.1664-53.6804 | 0.4576                    | 0.5039                         |
| Macrophage               | 1.1190    | 0.0480-26.1099 | 0.9442                    | 0.2526                         |
| Th1 cells                | 0.7720    | 0.6462-0.9222  | 0.0043                    | 0.0045                         |
| Th2 cells                | 0.9704    | 0.7959-1.1831  | 0.7662                    | 0.5972                         |
| CD8 T cells              | 0.7654    | 0.6450-0.9082  | 0.0022                    | 0.0064                         |
| PRF1                     | 0.8568    | 0.7165-1.0247  | 0.0905                    | 0.2426                         |
| GZMB                     | 0.8278    | 0.6810-1.0064  | 0.0579                    | 0.2017                         |
| Tregs                    | 0.5354    | 0.3088-0.9283  | 0.0261                    | 0.0343                         |
| MDSCs                    | 1.1618    | 0.7977-1.6920  | 0.4343                    | 0.8359                         |
